# Supplementary material for: The Small GTPase Rsg1 is important for the cytoplasmic localization and axonemal dynamics of intraflagellar transport proteins
Source: PubMed Central journal article supplement (PMC3850895; doi:10.1186/2046-2530-2-13), 2013-10-07

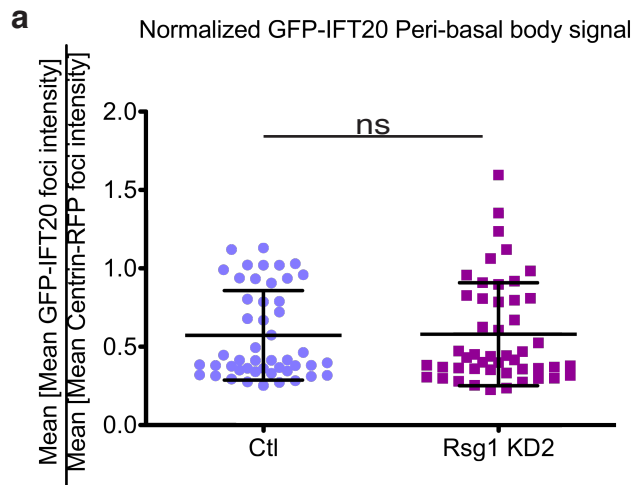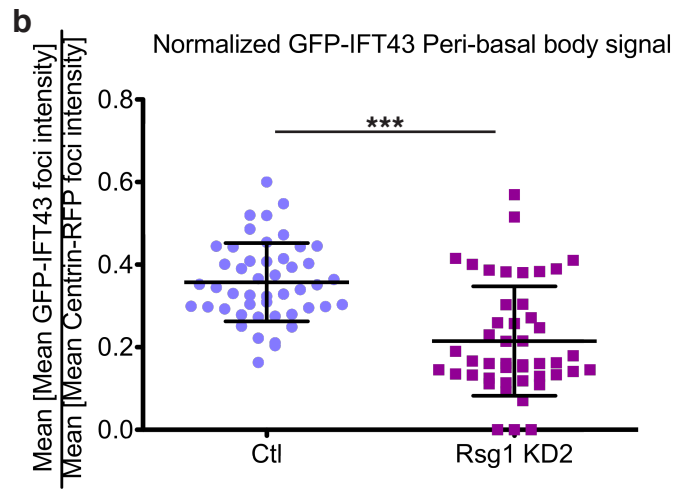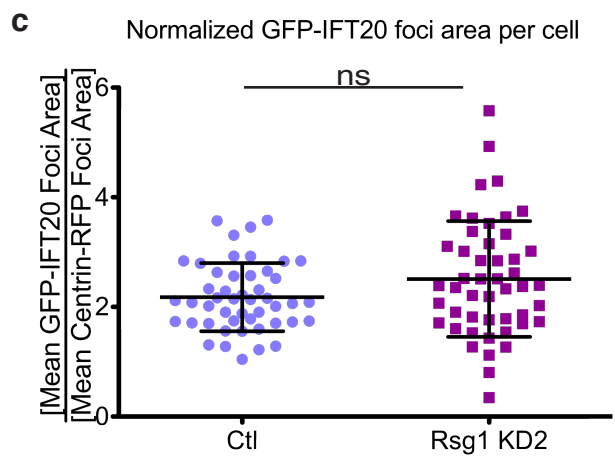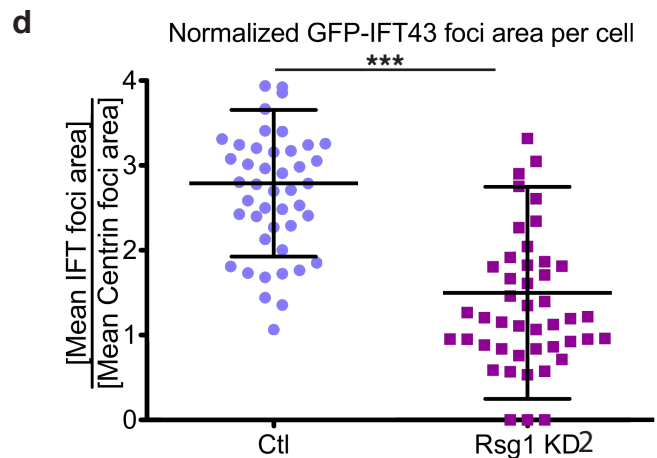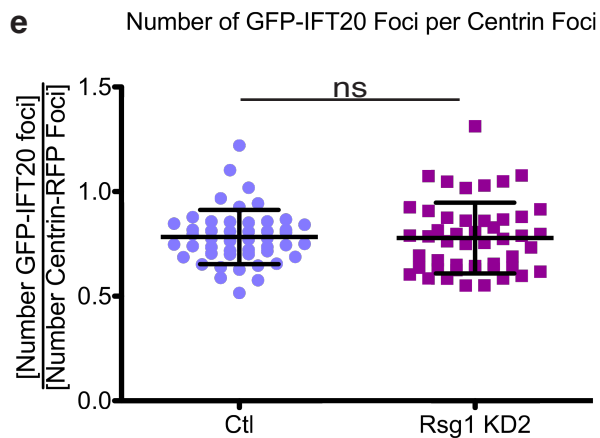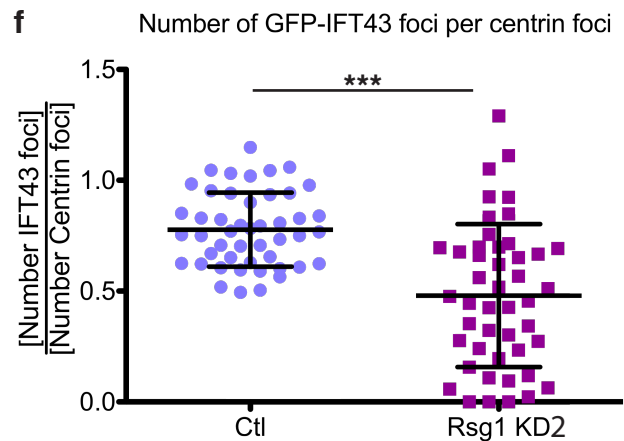

Supplement: 2046-2530-2-13-S5.pdf [file 2046-2530-2-13-S5.pdf]
